# Supplementary material for: KCa channel blockers increase effectiveness of the EGF receptor TK inhibitor erlotinib in non-small cell lung cancer cells (A549)
Source: PubMed Central journal article supplement (PMC8443639; doi:10.1038/s41598-021-97406-0), 2021-09-15

**Fig. 1Ba-suppl.**

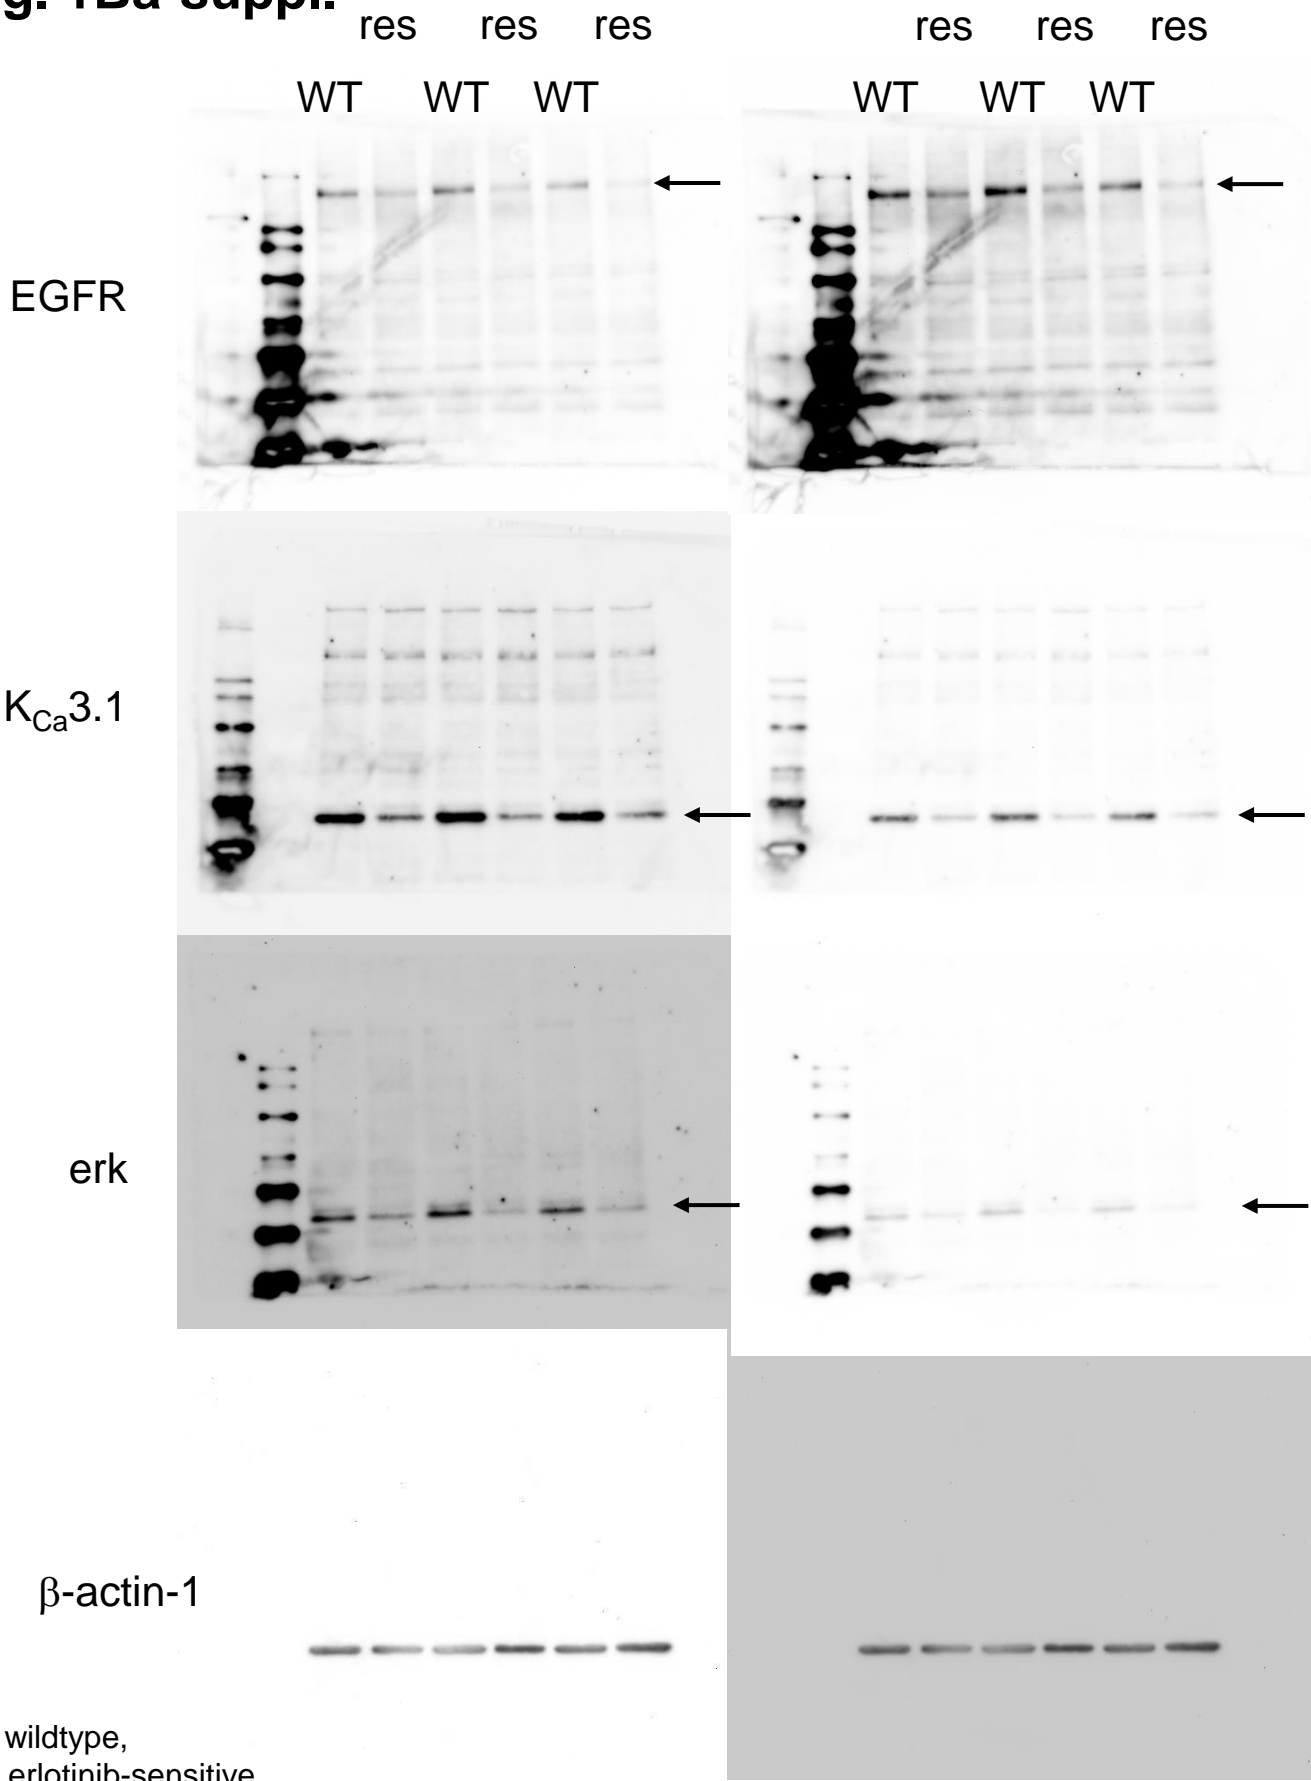

WT = wildtype,  
erlotinib-sensitive

res = erlotinib-resistant

# Fig. 1Ba-suppl.

$\beta$ -actin-2

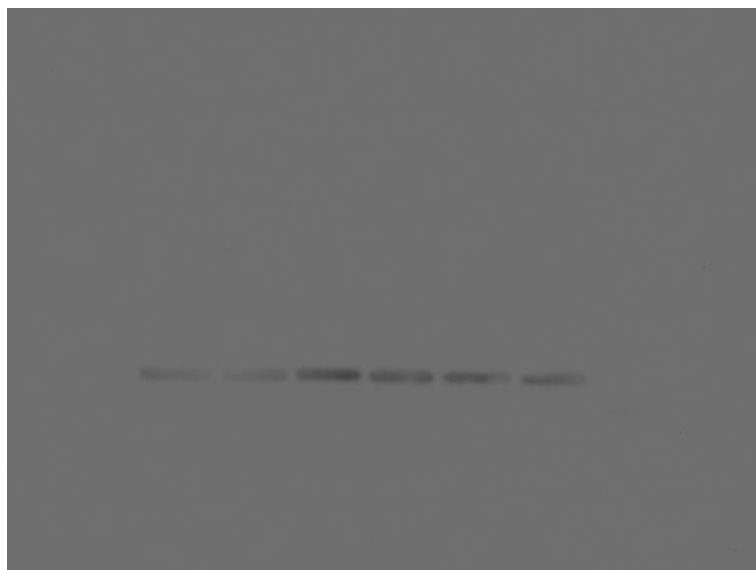

**Fig. 1Bb-suppl.**

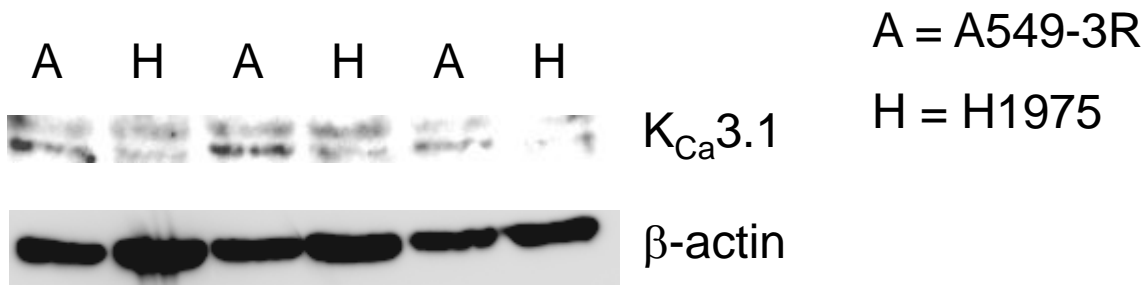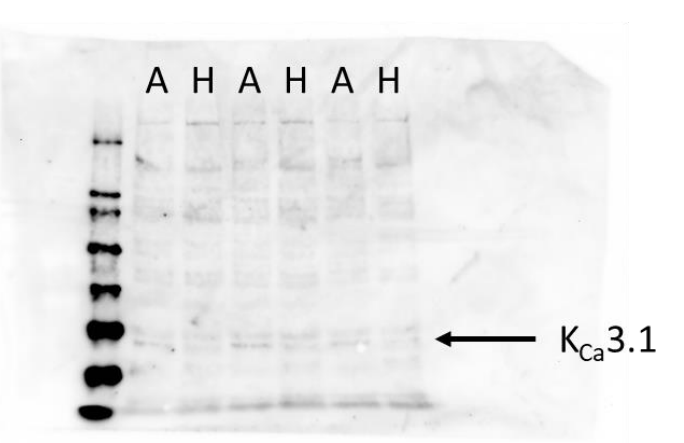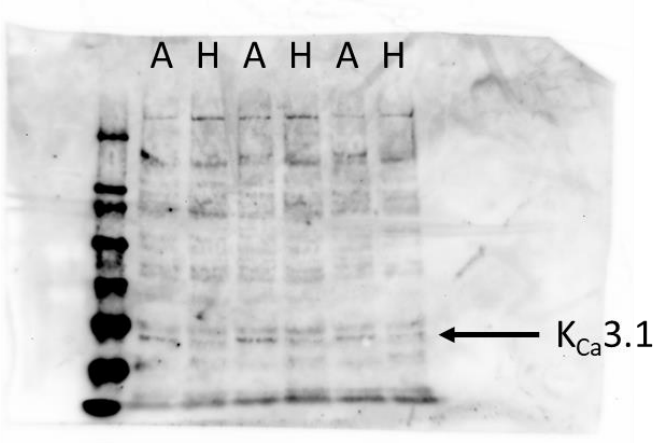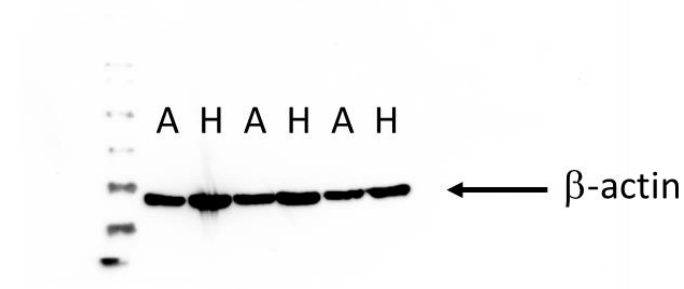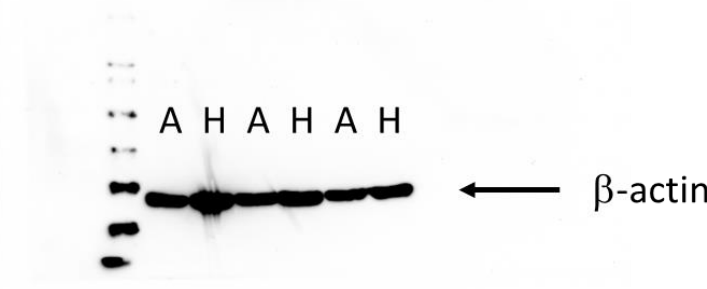

**Fig. 7A-suppl.**

n = normoxia h = hypoxia

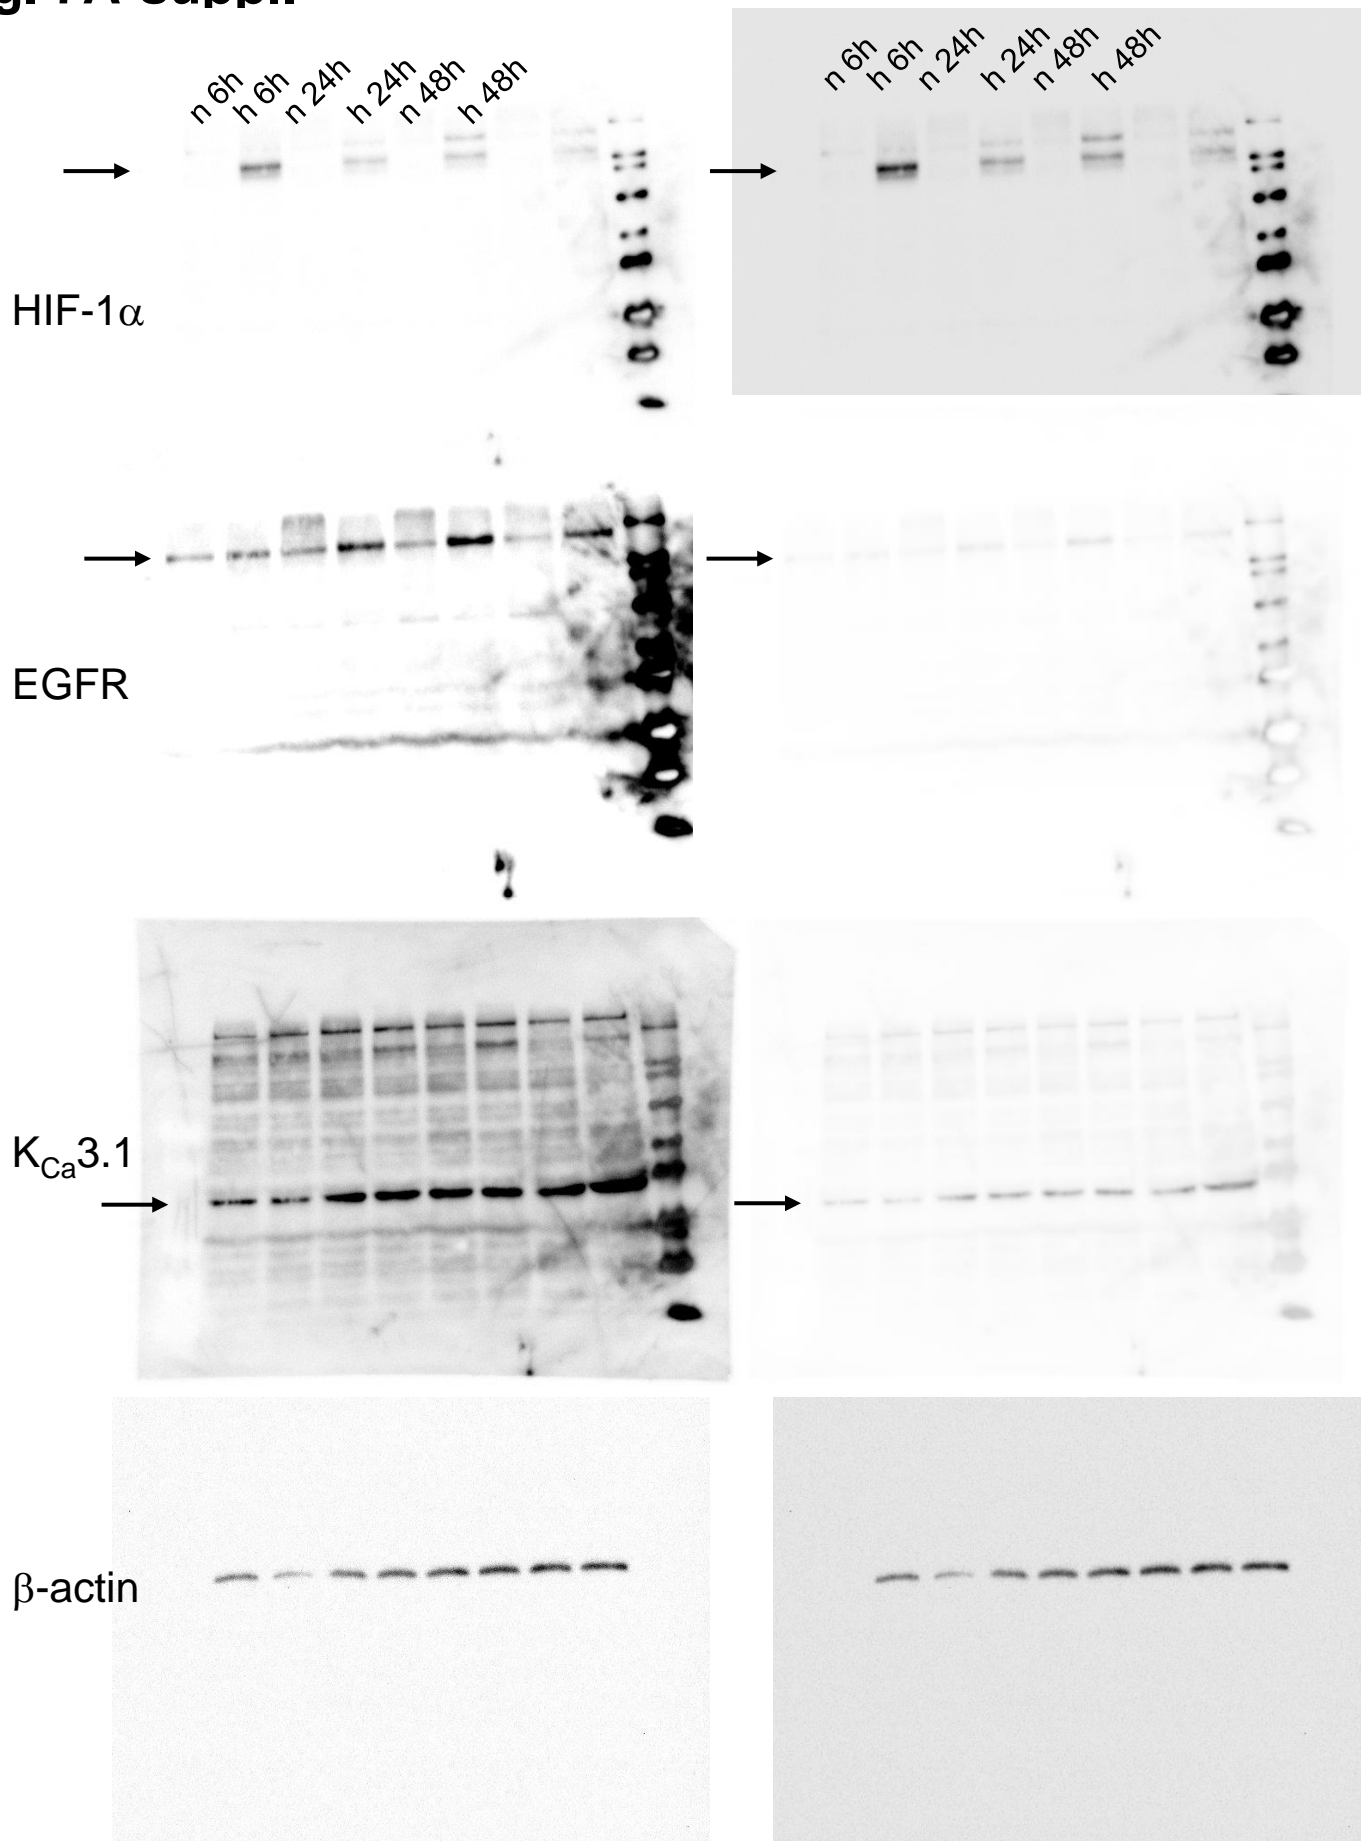

Supplement: 41598_2021_97406_MOESM1_ESM.pdf [file 41598_2021_97406_MOESM1_ESM.pdf]
